# Supplementary material for: Proteomic Profiling of Mouse Brain Pyruvate Kinase Binding Proteins: A Hint for Moonlighting Functions of PKM1?
Source: MDPI journal article supplement (doi:10.3390/ijms24087634), 2023-04-21
Supplement: s1 [file s1]

SUPPLEMENTARY FIGURE

PKM1 394 LFEELVRASSHSTDLM EAMAMGSVEASYKCLA 425

PKM2 394 LFEELRRLAPITSDPTEATAVGAVEASFKCCS 425

PKR/L 406 LFEELRRAAPLSRDPTEVTAIGAVEAAFKCCA 437

**Figure S1.** Alignment of amino acid sequences of PKM1, PKM2, and PKR/L. The synthetic PK peptide used in this study corresponds to the sequence of PKR/L.

SUPPLEMENTARY TABLES S1 and S2

**Supplementary Table S1.** Individual mouse brain proteins exclusively bound to PKM1 immobilized on CNBr-Sepharose

| #  | Accession number | Gene            | Recommended protein name (UniProt)                                | Peptides | Unique peptides | Sequence coverage, % | Confidence, % * | emPAI † | Adjusted p-value‡ | Protein function |
|----|------------------|-----------------|-------------------------------------------------------------------|----------|-----------------|----------------------|-----------------|---------|-------------------|------------------|
| 1  | O35490           | <i>BHMT</i>     | Betaine--homocysteine S-methyltransferase 1                       | 2        | 2               | 8.6                  | 100             | 25      | 2.55E-04          | 1                |
| 2  | P50396           | <i>GDI1</i>     | Rab GDP dissociation inhibitor alpha                              | 2        | 2               | 4.47                 | 100             | 26.6    | 1.59E-04          | 3                |
| 3  | P11798           | <i>CAMK2A</i>   | Calcium/calmodulin-dependent protein kinase type II subunit alpha | 1        | 1               | 6.28                 | 100             | 46.5    | 2.54E-04          | 3                |
| 4  | <b>P16125</b>    | <i>LDHB</i>     | <b>L-lactate dehydrogenase B chain</b>                            | 2        | 2               | 10.48                | 100             | 22.1    | 1.53E-04          | 1                |
| 5  | P05214           | <i>TUBA3A</i>   | Tubulin alpha-3 chain                                             | 7        | 0               | 22.89                | 99.77           | 18.6    | 1.56E-04          | 2                |
| 6  | P40124           | <i>CAP1</i>     | Adenylyl cyclase-associated protein 1                             | 1        | 1               | 3.8                  | 100             | 31.9    | 1.71E-04          | 2                |
| 7  | <b>P07901</b>    | <i>HSP90AA1</i> | <b>Heat shock protein HSP 90-alpha</b>                            | 2        | 2               | 3.68                 | 100             | 40.7    | 1.24E-04          | 4                |
| 8  | <b>Q9DBJ1</b>    | <i>PGAM1</i>    | <b>Phosphoglycerate mutase 1</b>                                  | 1        | 1               | 5.51                 | 99.4            | 38.7    | 1.07E-04          | 1                |
| 9  | <b>P60710</b>    | <i>ACTB</i>     | <b>Actin, cytoplasmic 1</b>                                       | 3        | 3               | 10.4                 | 100             | 29.8    | 1.09E-04          | 2                |
| 10 | <b>O08599</b>    | <i>STXBP1</i>   | Syntaxin-binding protein 1                                        | 2        | 2               | 2.86                 | 100             | 75.5    | 1.06E-04          | 5                |
| 11 | <b>P61982</b>    | <i>YWHAG</i>    | <b>14-3-3 protein gamma</b>                                       | 2        | 1               | 11.74                | 99.73           | 38.8    | 1.06E-04          | 3                |
| 12 | <b>P10126</b>    | <i>EEF1A1</i>   | <b>Elongation factor 1-alpha 1</b>                                | 1        | 1               | 6.28                 | 100             | 22.4    | 1.10E-04          | 5                |
| 13 | P17742           | <i>PPIA</i>     | Peptidyl-prolyl cis-trans isomerase A                             | 1        | 1               | 5.49                 | 99.77           | 209.9   | 8.06E-05          | 5                |
| 14 | <b>O08553</b>    | <i>DPYSL2</i>   | Dihydropyrimidinase-related protein 2                             | 2        | 2               | 2.8                  | 99.73           | 105     | 2.05E-04          | 5                |
| 15 | Q91ZJ5           | <i>UGP2</i>     | UTP--glucose-1-phosphate uridylyltransferase                      | 2        | 2               | 7.48                 | 99.4            | 100.3   | 1.01E-04          | 1                |

| #  | Accession number | Gene            | Recommended protein name (UniProt)                           | Peptides | Unique peptides | Sequence coverage, % | Confidence, % * | emPAI † | Adjusted p-value‡ | Protein function |
|----|------------------|-----------------|--------------------------------------------------------------|----------|-----------------|----------------------|-----------------|---------|-------------------|------------------|
| 16 | <b>O35945</b>    | <i>ALDH1A7</i>  | <b>Aldehyde dehydrogenase, cytosolic 1</b>                   | 1        | 1               | 2.59                 | 99.45           | 93.5    | 1.01E-04          | 1                |
| 17 | <b>P05063</b>    | <i>ALDOC</i>    | <b>Fructose-bisphosphate aldolase C</b>                      | 3        | 3               | 12.67                | 100             | 77.4    | 7.31E-05          | 1                |
| 18 | P68368           | <i>TUBA4A</i>   | Tubulin alpha-4A chain                                       | 7        | 1               | 21.88                | 99.73           | 59.3    | 8.95E-05          | 2                |
| 19 | P80314           | <i>CCT2</i>     | T-complex protein 1 subunit beta                             | 1        | 1               | 2.8                  | 100             | 55.9    | 1.87E-04          | 4                |
| 20 | <b>Q8C196</b>    | <i>CPS1</i>     | <b>Carbamoyl-phosphate synthase [ammonia], mitochondrial</b> | 2        | 2               | 2.47                 | 98.78           | 45.8    | 1.18E-04          | 1                |
| 21 | <b>Q04447</b>    | <i>CKB</i>      | <b>Creatine kinase B-type</b>                                | 5        | 5               | 13.91                | 95.52           | 41.7    | 1.05E-04          | 1                |
| 22 | Q63810           | <i>PPP3R1</i>   | Calcineurin subunit B type 1                                 | 1        | 1               | 10                   | 100             | 40.6    | 8.68E-05          | 3                |
| 23 | Q9D6F9           | <i>TUBB4A</i>   | Tubulin beta-4A chain                                        | 1        | 1               | 4.05                 | 99.77           | 30.7    | 1.71E-04          | 2                |
| 24 | A1L317           | <i>KRT24</i>    | Keratin, type I cytoskeletal 24                              | 1        | 1               | 3.13                 | 99.4            | 28.9    | 8.68E-05          | 2                |
| 25 | Q3THS6           | <i>MAT2A</i>    | S-adenosylmethionine synthase isoform type-2                 | 1        | 1               | 5.06                 | 100             | 24.8    | 1.06E-04          | 1                |
| 26 | <b>Q78PY7</b>    | <i>SND1</i>     | <b>Staphylococcal nuclease domain-containing protein 1</b>   | 1        | 1               | 2.2                  | 100             | 19.3    | 7.58E-05          | 5                |
| 27 | P62814           | <i>ATP6V1B2</i> | V-type proton ATPase subunit B, brain isoform                | 1        | 1               | 4.11                 | 99.4            | 18.9    | 7.78E-05          | 2                |
| 28 | P03995           | <i>GFAP</i>     | Glial fibrillary acidic protein                              | 1        | 1               | 2.56                 | 100             | 17.9    | 7.31E-05          | 2                |
| 29 | P55066           | <i>NCAN</i>     | Neurocan core protein                                        | 1        | 1               | 1.66                 | 100             | 16.7    | 9.66E-05          | 5                |

\*The confidence is a relative value defining the strength of the protein detection (detectable power) and considering peptides with scores above the homology and the identity threshold score at certain searching setting, e.i., mass tolerance (at MS and MS/MS levels), number of allowed missing sites for the digesting enzyme, correlation between possible and confident sequence coverage with molecular mass of the detected protein, fragments coverage of peptide, etc.

† emPAI—is an Exponentially Modified Protein Abundance index used typically to approximate relative abundance (quantitation) of the proteins in a mixture based on protein coverage by the peptide matches in a database search result.

‡ Raw p-value (*p*-value cut-off of 0.025) was adjusted using a Bonferroni correction.

Here, and in the subsequent table, moonlighting proteins are shown in bold. Numbers in the Functional group column designate the following protein functions: 1. metabolic enzymes; 2. proteins involved in cytoskeleton formation and trafficking; 3. proteins involved in signal transduction and enzyme activity regulation; 4. protective proteins and components of the ubiquitin–proteasome system; 5. protein regulators of gene expression, cell division, and differentiation.

**Supplementary Table S2.** Individual mouse brain proteins bound exclusively to the PK peptide immobilized on CNBr-Sepharose

| #  | Accession number | Gene          | Protein name (Uniprot)                         | Peptides | Unique peptides | Sequence coverage % | Confidence, % | emPAI  | Adjusted p-value | Functional group |
|----|------------------|---------------|------------------------------------------------|----------|-----------------|---------------------|---------------|--------|------------------|------------------|
| 1  | E9Q557           | <i>DESP</i>   | Desmoplakin                                    | 15       | 15              | 6                   | 99.73         | 45.82  | 2.71E-04         | 2                |
| 2  | O35887           | <i>CALU</i>   | Calumenin                                      | 4        | 4               | 12.7                | 100           | 44.14  | 1.07E-04         | 2                |
| 3  | O70456           | <i>1433S</i>  | 14-3-3 protein sigma                           | 8        | 6               | 24.6                | 100           | 32.85  | 4.99E-04         | 3                |
| 4  | O88569           | <i>ROA2</i>   | Heterogeneous nuclear ribonucleoproteins A2/B1 | 3        | 3               | 11.6                | 100           | 102.55 | 4.65E-04         | 5                |
| 5  | P10107           | <i>ANXA1</i>  | Annexin A1                                     | 2        | 2               | 5.5                 | 100           | 104.97 | 2.11E-04         | 3                |
| 6  | P07356           | <i>ANXA2</i>  | Annexin A2                                     | 8        | 8               | 26.3                | 96.49         | 47.73  | 1.17E-04         | 3                |
| 7  | P08113           | <i>ENPL</i>   | Endoplasmic reticulum chaperone BiP            | 3        | 3               | 4.1                 | 97.56         | 82.29  | 2.54E-04         | 2                |
| 8  | P08228           | <i>SODC</i>   | Superoxide dismutase [Cu-Zn]                   | 3        | 3               | 23.4                | 95.52         | 42.7   | 2.54E-04         | 4                |
| 10 | P09103           | <i>PDIA1</i>  | Protein disulfide-isomerase                    | 2        | 2               | 4.9                 | 99.4          | 59.28  | 1.16E-04         | 4                |
| 10 | P17751           | <i>TPIS</i>   | Triosephosphate isomerase                      | 2        | 2               | 7.7                 | 99.77         | 55.92  | 1.87E-04         | 1                |
| 11 | P17183           | <i>ENOG</i>   | Gamma-enolase                                  | 3        | 1               | 9.4                 | 99.77         | 104.97 | 7.31E-05         | 1                |
| 12 | P20029           | <i>BIP</i>    | Endoplasmic reticulum chaperone BiP            | 11       | 10              | 21.5                | 96.67         | 40.65  | 7.31E-05         | 4                |
| 13 | P101             | <i>EF1A1</i>  | Elongation factor 1-alpha 1                    | 5        | 5               | 10.6                | 100           | 46.5   | 5.55E-05         | 5                |
| 14 | P14206           | <i>RSSA</i>   | 40S ribosomal protein SA                       | 2        | 2               | 8.5                 | 100           | 45.82  | 7.27E-05         | 5                |
| 15 | P14211           | <i>CALR</i>   | Calreticulin                                   | 4        | 4               | 23.8                | 100           | 38.79  | 8.64E-05         | 3                |
| 16 | P16627           | <i>HS71L</i>  | Heat shock 70 kDa protein 1-like               | 4        | 1               | 10                  | 100           | 28.03  | 1.11E-04         | 4                |
| 17 | P17156           | <i>HSP72</i>  | Heat shock-related 70 kDa protein 2            | 5        | 1               | 11.2                | 99.73         | 27.54  | 9.73E-05         | 4                |
| 18 | P20152           | <i>VIME</i>   | Vimentin                                       | 12       | 12              | 22.7                | 99.73         | 21.76  | 1.66E-04         | 2                |
| 19 | P21107           | <i>TPM3</i>   | Tropomyosin alpha-3 chain                      | 8        | 2               | 18.9                | 99.73         | 18.65  | 1.05E-04         | 2                |
| 20 | P26039           | <i>TLN1</i>   | Talin-1                                        | 2        | 2               | 1                   | 99.73         | 18.14  | 1.41E-04         | 2                |
| 21 | P29595           | <i>NEDD8</i>  | NEDD8                                          | 2        | 2               | 17.3                | 97.4          | 100.27 | 1.09E-04         | 5                |
| 22 | P37804           | <i>TAGL</i>   | Transgelin                                     | 3        | 3               | 10.4                | 97.4          | 26.57  | 1.53E-04         | 2                |
| 23 | P45591           | <i>COF2</i>   | Cofilin-2                                      | 2        | 1               | 16.9                | 100           | 26.57  | 2.55E-04         | 3                |
| 24 | P48036           | <i>ANXA5</i>  | Annexin A5                                     | 2        | 2               | 9.4                 | 100           | 25.96  | 1.86E-04         | 3                |
| 25 | P48428           | <i>TBCA</i>   | Tubulin-specific chaperone A                   | 2        | 2               | 11.1                | 96.49         | 40.57  | 1.86E-04         | 4                |
| 26 | P48678           | <i>LMNA</i>   | Prelamin-A/C                                   | 11       | 11              | 19.2                | 98.18         | 39.29  | 1.55E-04         | 5                |
| 27 | P49312           | <i>ROA1</i>   | Heterogeneous nuclear ribonucleoprotein A1     | 3        | 3               | 12.8                | 98.18         | 30.68  | 1.01E-04         | 5                |
| 28 | P38647           | <i>GRP75</i>  | Stress-70 protein, mitochondrial               | 3        | 3               | 4.9                 | 95.23         | 30.68  | 1.06E-04         | 4                |
| 29 | P42208           | <i>02-Sep</i> | Septin-2                                       | 2        | 2               | 7.2                 | 95.76         | 20.46  | 1.06E-04         | 3                |
| 30 | P43274           | <i>H14</i>    | Histone H1.4                                   | 2        | 2               | 12.3                | 97.28         | 209.85 | 7.61E-05         | 5                |
| 31 | P52503           | <i>NDUS6</i>  | NADH                                           | 2        | 2               | 21.6                | 96.05         | 72.39  | 1.98E-04         | 1                |

| #  | Accession number | Gene         | Protein name (Uniprot)                                          | Peptides | Unique peptides | Sequence coverage % | Confidence, % | emPAI  | Adjusted p-value | Functional group |
|----|------------------|--------------|-----------------------------------------------------------------|----------|-----------------|---------------------|---------------|--------|------------------|------------------|
|    |                  |              | dehydrogenase [ubiquinone] iron-sulfur protein 6, mitochondrial |          |                 |                     |               |        |                  |                  |
| 32 | P56480           | <i>ATPB</i>  | ATP synthase subunit beta, mitochondrial                        | 4        | 4               | 15.3                | 100           | 71.96  | 8.25E-05         | 1                |
| 33 | <b>P62259</b>    | <b>1433E</b> | <b>14-3-3 protein epsilon</b>                                   | 3        | 1               | 12.2                | 97.67         | 65.12  | 8.25E-05         | 3                |
| 34 | P58252           | <i>EF2</i>   | Elongation factor 2                                             | 2        | 2               | 3.4                 | 99.73         | 59.84  | 1.06E-04         | 5                |
| 35 | P58771           | <i>TPM1</i>  | Tropomyosin alpha-1 chain                                       | 10       | 2               | 23.9                | 100           | 40.65  | 1.06E-04         | 2                |
| 36 | P60843           | <i>IF4A1</i> | Eukaryotic initiation factor 4A-I                               | 4        | 4               | 9.6                 | 99.45         | 31.28  | 1.09E-04         | 5                |
| 37 | P62806           | <i>H4</i>    | Histone H4                                                      | 4        | 4               | 40.8                | 99.45         | 25.41  | 1.09E-04         | 5                |
| 38 | P62918           | <i>RL8</i>   | 60S ribosomal protein L8                                        | 2        | 2               | 10.5                | 98.38         | 93.55  | 6.97E-05         | 5                |
| 39 | P62960           | <i>YBOX1</i> | Y-box-binding protein 1                                         | 6        | 6               | 30.1                | 100           | 93.55  | 1.06E-04         | 5                |
| 40 | P62984           | <i>RL40</i>  | Ubiquitin-60S ribosomal protein L40                             | 4        | 4               | 36.7                | 100           | 31.88  | 7.58E-05         | 5                |
| 41 | <b>P63260</b>    | <b>ACTG</b>  | <b>Actin, cytoplasmic 2</b>                                     | 13       | 1               | 42.4                | 100           | 29.79  | 9.67E-05         | 2                |
| 42 | P68134           | <i>ACTS</i>  | Actin, alpha skeletal muscle                                    | 9        | 3               | 26.6                | 100           | 28.88  | 1.13E-04         | 2                |
| 43 | P68040           | <i>RACK1</i> | Receptor of activated protein C kinase 1                        | 3        | 3               | 11                  | 95.51         | 22.36  | 8.95E-05         | 3                |
| 44 | P68254           | <i>1433T</i> | 14-3-3 protein theta                                            | 3        | 1               | 13.1                | 100           | 22.12  | 8.95E-05         | 3                |
| 45 | P68373           | <i>TBA1C</i> | Tubulin alpha-1C chain                                          | 5        | 5               | 18.7                | 99.77         | 24.83  | 1.24E-04         | 2                |
| 46 | P99024           | <i>TBB5</i>  | Tubulin beta-5 chain                                            | 4        | 2               | 13.3                | 99.73         | 167.52 | 1.24E-04         | 2                |
| 47 | P84078           | <i>ARF1</i>  | ADP-ribosylation factor 1                                       | 2        | 2               | 13.3                | 99.45         | 165.42 | 3.20E-04         | 3                |
| 48 | P84244           | <i>H33</i>   | Histone H3.3                                                    | 2        | 2               | 11.8                | 99.45         | 157.29 | 1.56E-04         | 5                |
| 49 | Q02257           | <i>PLAK</i>  | Junction plakoglobin                                            | 4        | 4               | 6.4                 | 99.77         | 135.3  | 1.56E-04         | 2                |
| 50 | Q05186           | <i>RCN1</i>  | Reticulocalbin-1                                                | 2        | 2               | 12.9                | 100           | 110.94 | 5.23E-05         | 3                |
| 51 | Q3THE2           | <i>ML12B</i> | Myosin regulatory light chain 12B                               | 3        | 1               | 23.3                | 99.77         | 77.36  | 1.09E-04         | 2                |
| 52 | Q60817           | <i>NACA</i>  | Nascent polypeptide-associated complex subunit alpha            | 2        | 2               | 13                  | 98.7          | 77.36  | 2.71E-05         | 5                |
| 53 | Q61696           | <i>HS71A</i> | Heat shock 70 kDa protein 1A                                    | 5        | 1               | 12.3                | 98.7          | 75.46  | 5.59E-05         | 4                |
| 54 | Q62048           | <i>PEA15</i> | Astrocytic phosphoprotein PEA-15                                | 2        | 2               | 27.7                | 99.4          | 75.46  | 5.59E-05         | 3                |
| 55 | Q64727           | <i>VINC</i>  | Vinculin                                                        | 2        | 2               | 3.8                 | 99.4          | 51.32  | 3.38E-05         | 2                |

| #  | Accession number | Gene          | Protein name (Uniprot)                            | Peptides | Unique peptides | Sequence coverage % | Confidence, % | emPAI | Adjusted p-value | Functional group |
|----|------------------|---------------|---------------------------------------------------|----------|-----------------|---------------------|---------------|-------|------------------|------------------|
| 56 | Q68FD5           | <i>CLH1</i>   | Clathrin heavy chain 1                            | 5        | 5               | 5.3                 | 99.4          | 49.51 | 4.69E-05         | 2                |
| 57 | Q6IRU2           | <i>TPM4</i>   | Tropomyosin alpha-4 chain                         | 5        | 4               | 12.9                | 100           | 41.68 | 8.68E-05         | 2                |
| 58 | Q7TPR4           | <i>ACTN1</i>  | Alpha-actinin-1                                   | 8        | 5               | 13.7                | 99.73         | 40.57 | 6.17E-05         | 2                |
| 59 | Q8BFR5           | <i>EFTU</i>   | Elongation factor Tu, mitochondrial               | 2        | 2               | 2.7                 | 100           | 38.72 | 4.46E-05         | 5                |
| 60 | Q8BG05           | <i>ROA3</i>   | Heterogeneous nuclear ribonucleoprotein A3        | 4        | 4               | 15                  | 100           | 34.03 | 5.09E-05         | 5                |
| 61 | Q8BKC5           | <i>IPO5</i>   | Importin-5                                        | 2        | 2               | 4.1                 | 99.82         | 33.36 | 6.68E-05         | 2                |
| 62 | Q8BTM8           | <i>FLNA</i>   | Filamin-A                                         | 18       | 17              | 10.3                | 100           | 32.85 | 7.48E-05         | 2                |
| 63 | Q8C1B7           | <i>11-Sep</i> | Septin-11                                         | 3        | 3               | 13                  | 100           | 31.88 | 4.12E-05         | 3                |
| 64 | Q8CGP6           | <i>H2A1H</i>  | Histone H2A type 1-H H2A                          | 2        | 2               | 12.5                | 99.77         | 28.88 | 4.86E-05         | 5                |
| 65 | Q8VDD5           | <i>MYH9</i>   | Myosin-9                                          | 20       | 20              | 11.7                | 99.77         | 25.65 | 4.71E-05         | 2                |
| 66 | Q8VHX6           | <i>FLNC</i>   | Filamin-C                                         | 5        | 4               | 2.9                 | 100           | 24.96 | 1.27E-04         | 2                |
| 67 | Q922R8           | <i>PDIA6</i>  | Protein disulfide-isomerase A6                    | 2        | 2               | 6.4                 | 98.7          | 24.83 | 1.17E-04         | 4                |
| 68 | Q99K48           | <i>NONO</i>   | Non-POU domain-containing octamer-binding protein | 2        | 2               | 6.6                 | 100           | 22.44 | 2.72E-05         | 5                |
| 69 | Q99PT1           | <i>GDIR1</i>  | Rho GDP-dissociation inhibitor 1                  | 2        | 2               | 8.3                 | 99.45         | 22.36 | 2.64E-05         | 3                |
| 70 | Q9CQ19           | <i>MYL9</i>   | Myosin regulatory light polypeptide 9             | 3        | 1               | 23.3                | 100           | 21.9  | 3.04E-05         | 2                |
| 71 | Q9CQV8           | <i>1433B</i>  | 14-3-3 protein beta/alpha                         | 3        | 1               | 13                  | 100           | 20.74 | 2.10E-05         | 3                |
| 72 | Q9JHU4           | <i>DYHC1</i>  | Cytoplasmic dynein 1 heavy chain 1                | 2        | 2               | 0.6                 | 100           | 20.4  | 2.44E-05         | 2                |
| 73 | Q9JKF1           | <i>IQGA1</i>  | Ras GTPase-activating-like protein IQGAP1         | 2        | 2               | 2.1                 | 100           | 19.29 | 2.65E-05         | 3                |
| 74 | Q9Z2U0           | <i>PSA7</i>   | Proteasome subunit alpha type-7                   | 3        | 3               | 12.9                | 100           | 19.29 | 5.88E-05         | 4                |
| 75 | Q9QXS1           | <i>PLEC</i>   | Plectin                                           | 2        | 2               | 0.6                 | 100           | 18.92 | 5.88E-05         | 2                |
| 76 | Q9QXS6           | <i>DREB</i>   | Drebrin                                           | 5        | 5               | 9.1                 | 98.7          | 18.92 | 1.59E-04         | 2                |
| 77 | Q9Z1Q5           | <i>CLIC1</i>  | Chloride intracellular channel protein 1          | 2        | 2               | 10                  | 98.7          | 18.65 | 9.19E-06         | 2                |
